# Supplementary material for: HATRIC-based identification of receptors for orphan ligands
Source: PubMed Central journal article supplement (PMC5904110; doi:10.1038/s41467-018-03936-z), 2018-04-17
Supplement: 41467_2018_3936_MOESM2_ESM.pdf [file 41467_2018_3936_MOESM2_ESM.pdf]

## **Descriptions of Additional Supplementary Files**

File Name: Supplementary Data 1

Description: Quantification data for EGF-based HATRIC-LRC on 20 million H-358 cells without applying surfaceome filter

File Name: Supplementary Data 2

Description: Significance testing result for EGF-based HATRIC-LRC on 20 million H-358 cells without applying surfaceome filter

File Name: Supplementary Data 3

Description: List of cell surface proteins for data filtering prior to quantitative analysis in HATRIC-LRC

File Name: Supplementary Data 4

Description: Quantification data EGF-based HATRIC-LRC on 20 million H-358 cells with application of cell surface protein filter

File Name: Supplementary Data 5

Description: Significance testing result for EGF-based HATRIC-LRC on 20 million H-358 cells with application of cell surface protein filter

File Name: Supplementary Data 6

Description: Quantification data for anti-EGFR antibody- and holo-transferrin-based HATRIC-LRC on 1 million MDA-MB231 cells.

File Name: Supplementary Data 7

Description: Significance testing result for anti-EGFR antibody- and holo-transferrin-based HATRIC-LRC on 1 million MDA-MB231 cells.

File Name: Supplementary Data 8

Description: Quantification data for anti-EGFR antibody- and holo-transferrin-based TRICEPS-LRC on 1 million MDA-MB231 cells.

File Name: Supplementary Data 9

Description: Significance testing result for anti-EGFR antibody- and holo-transferrin-based TRICEPS-LRC on 1 million MDA-MB231 cells.

File Name: Supplementary Data 10

Description: Quantification data for folate-based HATRIC-LRC

File Name: Supplementary Data 11

Description: Significance testing result for folate-based HATRIC-LRC.

File Name: Supplementary Data 12

Description: Quantification data for H3N2-based HATRIC-LRC.

File Name: Supplementary Data 13

Description: Significance testing result for H3N2-based HATRIC-LRC.

File Name: Supplementary Data 14

Description: qPCR data from the siRNA-transfected cells (tab 1) and sequences of primers used for the qPCR (tab 2).

File Name: Supplementary Data 15

Description: Results of statistical significance testing for siRNA depletion experiment.
